# Supplementary material for: Unconditional Cash and Family Investments in Infants: Evidence from a Large-Scale Cash Transfer Experiment in the U.S.
Source: Research Square preprint supplement (doi:10.21203/rs.3.rs-2507540/v1), 2023-02-07
Supplement: Supplementary file 1 [file ff5fba6ebf0af766634313bb.pdf]

Appendix Figure A1. Consort diagram

Appendix Table A1. Balance across baseline measures for full sample

Appendix Table A2. Wave 1 follow-up completion rates

Appendix Table A3. Baseline characteristics for Wave 1 sample

Appendix Table A4. Descriptive analyses of transaction data

Appendix Table A5. Point-of-sale transaction amounts

Appendix Table A6a–f. ITT estimates of selected pre-registered outcomes, weighted

Appendix Table A7. Selected ITT estimates pre-pandemic sample

Appendix Table A8. ITT estimates of maternal sleep

Appendix Table A9. ITT estimates of item level outcomes of indices

Appendix Table A10. ITT estimates, adjusting for completed families

Appendix Table A11. Variable descriptions

# UNCONDITIONAL CASH AND FAMILY INVESTMENTS IN INFANTS

Appendix Figure A1. Wave 1 CONSORT Diagram

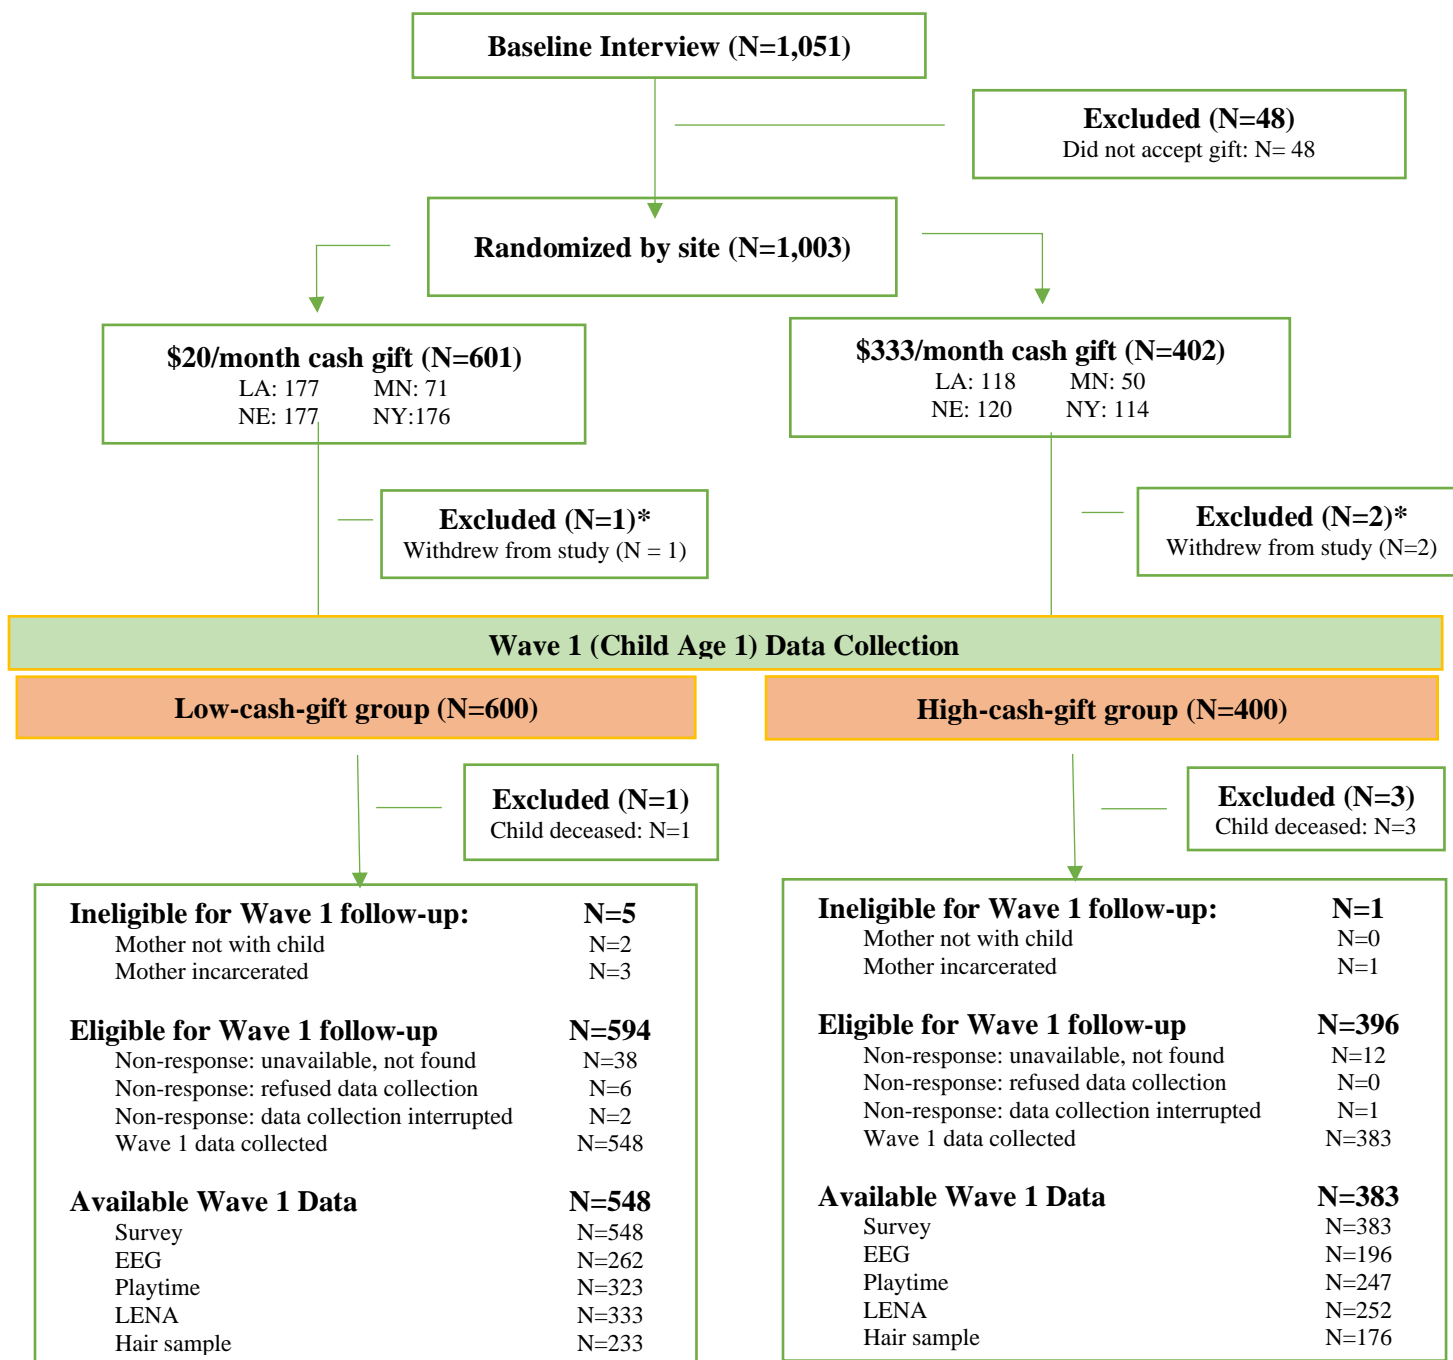

\*Participants withdrew from the study before spending any money on the card and only a few days after randomization. Thus, they were not considered as the **target sample** for future waves of data collection.

# UNCONDITIONAL CASH AND FAMILY INVESTMENTS IN INFANTS

Appendix Table A1. Balance across baseline measures between high- and low-cash-gift groups, full study sample (n=1,000)

|                                                    | <u>Low-cash-gift group</u> |     | <u>High-cash-gift group</u> |     | <u>Std. mean difference</u> |             | p-value |
|----------------------------------------------------|----------------------------|-----|-----------------------------|-----|-----------------------------|-------------|---------|
|                                                    | mean (sd)                  | N   | mean (sd)                   | N   | Hedges' g                   | Cox's Index |         |
| Child is female                                    | 0.50                       | 600 | 0.48                        | 400 |                             | -0.06       | 0.458   |
| Child weight at birth (pounds)                     | 7.13<br>(1.08)             | 599 | 7.09<br>(1.01)              | 399 | -0.04                       |             | 0.567   |
| Child gestational age (weeks)                      | 39.09<br>(1.25)            | 596 | 39.04<br>(1.24)             | 399 | -0.04                       |             | 0.512   |
| Mother age at birth (years)                        | 26.80<br>(5.82)            | 600 | 27.38<br>(5.86)             | 400 | 0.10                        |             | 0.113   |
| Mother education (years)                           | 11.88<br>(2.83)            | 593 | 11.88<br>(2.96)             | 398 | -0.00                       |             | 0.978   |
| Mother race/ethnicity: white, non-Hispanic         | 0.11                       | 600 | 0.09                        | 400 |                             | -0.17       | 0.128   |
| Mother race/ethnicity: Black, non-Hispanic         | 0.40                       | 600 | 0.44                        | 400 |                             | 0.11        | 0.091   |
| Mother race/ethnicity: multiple, non-Hispanic      | 0.04                       | 600 | 0.03                        | 400 |                             | -0.18       | 0.369   |
| Mother race/ethnicity: other or unknown            | 0.05                       | 600 | 0.03                        | 400 |                             | -0.37       | 0.066   |
| Mother race/ethnicity: Hispanic                    | 0.41                       | 600 | 0.41                        | 400 |                             | 0.01        | 0.594   |
| Mother marital status: never married               | 0.42                       | 600 | 0.49                        | 400 |                             | 0.18        | 0.024   |
| Mother marital status: single, living with partner | 0.26                       | 600 | 0.22                        | 400 |                             | -0.14       | 0.119   |
| Mother marital status: married                     | 0.21                       | 600 | 0.21                        | 400 |                             | 0.02        | 0.791   |
| Mother marital status: divorced/separated          | 0.05                       | 600 | 0.03                        | 400 |                             | -0.37       | 0.064   |
| Mother marital status: other or unknown            | 0.06                       | 600 | 0.04                        | 400 |                             | -0.18       | 0.400   |
| Mother health is good or better                    | 0.88                       | 600 | 0.92                        | 400 |                             | 0.25        | 0.041   |
| Mother depression (CESD)                           | 0.68                       | 600 | 0.69                        | 400 | 0.02                        |             | 0.805   |

# UNCONDITIONAL CASH AND FAMILY INVESTMENTS IN INFANTS

|                                          |                    |     |                    |     |       |       |
|------------------------------------------|--------------------|-----|--------------------|-----|-------|-------|
| Cigarettes per week during pregnancy     | (0.45)<br>5.05     | 595 | (0.46)<br>3.45     | 397 | -0.09 | 0.111 |
| Alcohol drinks per week during pregnancy | (21.17)<br>0.17    | 598 | (11.76)<br>0.03    | 399 | -0.11 | 0.052 |
| Number of children born to mother        | (1.63)<br>2.40     | 600 | (0.39)<br>2.53     | 400 | 0.09  | 0.146 |
| Number of adults in household            | (1.38)<br>2.12     | 600 | (1.41)<br>2.03     | 400 | -0.09 | 0.156 |
| Biological father lives in household     | (1.00)<br>0.40     | 600 | (0.96)<br>0.35     | 400 | -0.12 | 0.154 |
| Household combined income                | 22,466<br>(21,360) | 562 | 20,918<br>(16,146) | 370 | -0    | 0.219 |
| Household income unknown                 | 0.06               | 600 | 0.07               | 400 | 0.14  | 0.482 |
| Household net worth                      | -1,981<br>(28,640) | 531 | -3,308<br>(20,323) | 358 | -0    | 0.423 |
| Household net worth unknown              | 0.12               | 600 | 0.10               | 400 | -0.09 | 0.644 |

Joint Test:  $\chi^2(30)=34.02$ , p-value=0.238, n=1,000.

Notes: P-values were derived from a series of OLS bivariate regressions in which each respective baseline characteristic was regressed on the treatment status indicator using robust standard errors and site-level fixed effects. The bivariate regressions were also run without site-level fixed effects, and the p-values differed on average by 0.011. The p-values without fixed effects do not appear in the table. The joint test of orthogonality was conducted using a probit model with robust standard errors and site-level fixed effects.

Standardized mean differences were calculated using Hedges' g for continuous variables and Cox's Index for dichotomous variables.

If there were more than 10 missing cases for a covariate, missing data dummies were included in the table and the joint test. If fewer than 10 cases were missing, missing data dummies were not included in the table but were included in the joint test.

Chi-square tests of independence were conducted for the two categorical variables: mother race/ethnicity and mother marital status. For both tests,  $p>0.05$ .

# UNCONDITIONAL CASH AND FAMILY INVESTMENTS IN INFANTS

Appendix Table A2. Wave 1 follow-up completion rates

|                   | Percentage of all participants | Number | Percentage of high-cash-gift participants | Percentage of low-cash-gift participants |
|-------------------|--------------------------------|--------|-------------------------------------------|------------------------------------------|
| Wave 1 sample     | 0.940                          | 931    | 0.967                                     | 0.923                                    |
| New Orleans, LA   | 0.925                          | 272    | 0.966                                     | 0.898                                    |
| Twin Cities, MN   | 0.933                          | 112    | 0.940                                     | 0.929                                    |
| Greater Omaha, NE | 0.948                          | 272    | 0.974                                     | 0.930                                    |
| New York City, NY | 0.952                          | 275    | 0.974                                     | 0.937                                    |

Note: Completion rates are calculated as the percent of Wave 1 follow-up respondents divided by all eligible respondents enrolled and consented for participation in follow-up research at study entry, and thus does not adjust for the small number of respondents ineligible due to the infant being deceased (n=4), mother's incarceration (n=4), or mother's separation from child (n=2) as might be considered in adjusting the denominator for an effective response rate.

# UNCONDITIONAL CASH AND FAMILY INVESTMENTS IN INFANTS

Appendix Table A3. Baseline characteristics by high- and low-cash-gift groups, age 1 sample (n=931)

|                                                                     | <u>Low-cash-gift group</u> |     | <u>High-cash-gift group</u> |     | <u>Std. mean difference</u> |             | p-value |
|---------------------------------------------------------------------|----------------------------|-----|-----------------------------|-----|-----------------------------|-------------|---------|
|                                                                     | Mean (sd)                  | N   | Mean (sd)                   | N   | Hedges' g                   | Cox's Index |         |
| Child is female                                                     | 0.505                      | 548 | 0.478                       | 383 |                             | -0.065      | 0.402   |
| Child weight at birth (pounds)                                      | 7.1<br>(1.1)               | 548 | 7.1<br>(1.0)                | 383 | -0.025                      |             | 0.711   |
| Child is first biological child of mother                           | 0.296                      | 548 | 0.285                       | 383 |                             | -0.032      | 0.721   |
| Child gestational age (weeks)                                       | 39.1<br>(1.2)              | 548 | 39.0<br>(1.3)               | 383 | -0.048                      |             | 0.477   |
| Mother intends to breastfeed child                                  | 0.774                      | 548 | 0.749                       | 383 |                             | -0.083      | 0.415   |
| Mother age at birth (years)                                         | 26.9<br>(5.8)              | 548 | 27.4<br>(5.8)               | 383 | 0.082                       |             | 0.190   |
| Mother education (years)                                            | 11.9<br>(2.8)              | 541 | 11.9<br>(3.0)               | 381 | 0.017                       |             | 0.782   |
| Mother race/ethnicity: white, non-Hispanic                          | 0.106                      | 548 | 0.081                       | 383 |                             | -0.180      | 0.159   |
| Mother race/ethnicity: Black, non-Hispanic                          | 0.387                      | 548 | 0.441                       | 383 |                             | 0.135       | 0.071   |
| Mother race/ethnicity: Asian or Pacific Islander, non-Hispanic      | 0.007                      | 548 | 0.010                       | 383 |                             | 0.218       | 0.642   |
| Mother race/ethnicity: American Indian, Eskimo, Aleut, non-Hispanic | 0.015                      | 548 | 0.000                       | 383 |                             | .           | 0.005   |
| Mother race/ethnicity: multiple, non-Hispanic                       | 0.042                      | 548 | 0.031                       | 383 |                             | -0.191      | 0.369   |
| Mother race/ethnicity: other or unknown                             | 0.022                      | 548 | 0.013                       | 383 |                             | -0.324      | 0.294   |
| Mother race/ethnicity: Hispanic                                     | 0.422                      | 548 | 0.423                       | 383 |                             | 0.002       | 0.769   |
| Mother marital status: never married                                | 0.418                      | 548 | 0.496                       | 383 |                             | 0.191       | 0.017   |
| Mother marital status: single, living with partner                  | 0.270                      | 548 | 0.214                       | 383 |                             | -0.186      | 0.049   |
| Mother marital status: married                                      | 0.215                      | 548 | 0.214                       | 383 |                             | -0.004      | 0.998   |
| Mother marital status: divorced/separated                           | 0.046                      | 548 | 0.029                       | 383 |                             | -0.290      | 0.181   |
| Mother marital status: other or unknown                             | 0.051                      | 548 | 0.047                       | 383 |                             | -0.052      | 0.763   |

## UNCONDITIONAL CASH AND FAMILY INVESTMENTS IN INFANTS

|                                                                                      |                    |     |                    |     |        |       |
|--------------------------------------------------------------------------------------|--------------------|-----|--------------------|-----|--------|-------|
| Mother health is good or better                                                      | 0.880              | 548 | 0.924              | 383 | 0.306  | 0.022 |
| Mother depression (CESD)                                                             | 0.7<br>(0.4)       | 548 | 0.7<br>(0.4)       | 383 | -0.009 | 0.846 |
| Cigarettes per week during pregnancy                                                 | 4.7<br>(20.2)      | 548 | 3.1<br>(11.1)      | 383 | -0.091 | 0.118 |
| Alcohol drinks per week during pregnancy                                             | 0.2<br>(1.7)       | 548 | 0.0<br>(0.4)       | 383 | -0.096 | 0.090 |
| Number of children born to mother                                                    | 2.4<br>(1.4)       | 548 | 2.5<br>(1.4)       | 383 | 0.079  | 0.242 |
| Number of adults in household                                                        | 2.1<br>(1.0)       | 548 | 2.0<br>(1.0)       | 383 | -0.062 | 0.351 |
| Biological father lives in household                                                 | 0.411              | 548 | 0.350              | 383 | -0.157 | 0.061 |
| Household net worth                                                                  | -2,188<br>(29,366) | 489 | -3,268<br>(20,722) | 342 | -0.041 | 0.537 |
| Household net worth unknown                                                          | 0.108              | 548 | 0.107              | 383 | -0.006 | 0.996 |
| Household income baseline (imputing missing values with unconfirmed combined income) | 21,453<br>(16,563) | 548 | 21,533<br>(16,332) | 383 | 0.005  | 0.953 |
| Mother worked for pay anytime while pregnant                                         | 0.569              | 548 | 0.567              | 383 | -0.005 | 0.898 |
| Mother continued working until birth                                                 | 0.276              | 312 | 0.267              | 217 | -0.028 | 0.839 |
| Mother stopped working before birth                                                  | 0.724              | 312 | 0.733              | 217 | 0.028  | 0.839 |
| Mother planning to go back to work                                                   | 0.920              | 312 | 0.912              | 217 | -0.063 | 0.768 |
| Mother plans to work now that baby is born                                           | 0.729              | 236 | 0.771              | 166 | 0.136  | 0.348 |
| In net worth poverty                                                                 | 0.796              | 548 | 0.820              | 383 | 0.094  | 0.358 |
| Household received any benefit                                                       | 0.951              | 548 | 0.971              | 383 | 0.330  | 0.100 |
| Household received cash assistance                                                   | 0.128              | 548 | 0.164              | 383 | 0.176  | 0.105 |

N reported here is the number of mothers asked a survey question. For example, only mothers who reported working in the year prior to pregnancy were asked if they planned to return to work, and only those who did not report working were asked if they planned to work now that the baby is born. For yes/no questions, the number responding yes can be computed as the product of the mean and the reported N who were asked the question. P-values were derived from a series of OLS bivariate regressions in which the baseline characteristic was regressed on the treatment status indicator using robust standard errors and site-level fixed effects. Standardized mean differences were calculated using Hedges' g for continuous variables and Cox's Index for dichotomous variables. If there were more than 10 missing cases for a covariate, missing data dummies were included in the table. If there were less than 10 cases missing, missing data dummies were not included in the table. Chi-square tests of independence were conducted for the two categorical variables: mother race/ethnicity and mother marital status. For both tests,  $p > 0.05$ .

# UNCONDITIONAL CASH AND FAMILY INVESTMENTS IN INFANTS

Appendix Table A4. Descriptive analyses of transactions from the 4MyBaby debit card

|                                                | Age 1 survey    |               |                 | 12 months of age |               |                 |
|------------------------------------------------|-----------------|---------------|-----------------|------------------|---------------|-----------------|
|                                                | Total sample    | Low cash gift | High cash gift  | Total sample     | Low cash gift | High cash gift  |
| <b>Use of 4MyBaby card</b>                     |                 |               |                 |                  |               |                 |
| Haven't used the card                          | 2%              | 3%            | 0%              | 2%               | 3%            | 0%              |
| Used the card every month                      | 30%             | 13%           | 53%             | 29%              | 12%           | 52%             |
| Other                                          | 68%             | 84%           | 47%             | 69%              | 85%           | 48%             |
| Sample                                         | 839             | 484           | 355             | 839              | 484           | 355             |
| <b>Success of transactions</b>                 |                 |               |                 |                  |               |                 |
| No. of approved transactions                   | 61.59           | 24.4          | 112.28          | 57.84            | 22.3          | 106.3           |
| No. of failed transactions, insufficient funds | 3.71            | 2.86          | 4.87            | 3.44             | 2.63          | 4.56            |
| No. of failed transactions, PIN problems       | 3.06            | 2.34          | 4.05            | 2.95             | 2.26          | 3.9             |
| <b>Overview of expenditures</b>                |                 |               |                 |                  |               |                 |
| Amount of net approved transactions (total)    | \$ 1,877.17     | \$ 233.74     | \$ 4,117.79     | \$ 1,786.25      | \$ 215.96     | \$ 3,927.16     |
| Avg. amount spent by participant by month      | \$ 143.06       | \$ 17.17      | \$ 314.70       | \$ 141.87        | \$ 17.12      | \$ 311.95       |
| Total amount spent                             | \$ 1,588,733.63 | \$ 113,919.61 | \$ 1,474,814.00 | \$ 1,511,792.38  | \$ 105,319.94 | \$ 1,406,472.38 |



# UNCONDITIONAL CASH AND FAMILY INVESTMENTS IN INFANTS

Appendix Table A5. Point-of-sale transaction amounts by type, top 15 categories by total amount, Wave 1 sample as of June 2020

|                                                          | Total sample     |                              | Low-cash-gift group |                              | High-cash-gift group |                              |
|----------------------------------------------------------|------------------|------------------------------|---------------------|------------------------------|----------------------|------------------------------|
|                                                          | Expenditure (\$) | % of sample with transaction | Expenditure (\$)    | % of sample with transaction | Expenditure (\$)     | % of sample with transaction |
| <b>By type of named venue</b>                            |                  |                              |                     |                              |                      |                              |
| ATM cash withdrawals                                     | \$613.57         | 0.46                         | \$10.79             | 0.17                         | \$1,435.39           | 0.85                         |
| Dollar discount stores                                   | \$274.35         | 0.81                         | \$48.37             | 0.75                         | \$582.44             | 0.9                          |
| Other <sup>1</sup>                                       | \$259.10         | NA                           | \$32.17             | NA                           | \$568.49             | NA                           |
| Grocery stores and supermarkets                          | \$171.70         | 0.77                         | \$31.51             | 0.67                         | \$362.83             | 0.91                         |
| Fuel/service stations                                    | \$100.35         | 0.62                         | \$34.19             | 0.55                         | \$190.55             | 0.71                         |
| Fast food                                                | \$78.23          | 0.73                         | \$23.21             | 0.64                         | \$153.23             | 0.85                         |
| Phone                                                    | \$66.85          | 0.32                         | \$2.89              | 0.14                         | \$154.04             | 0.57                         |
| Department and variety stores                            | \$51.03          | 0.35                         | \$5.69              | 0.19                         | \$112.86             | 0.58                         |
| Online variety stores                                    | \$44.50          | 0.23                         | \$6.29              | 0.11                         | \$96.60              | 0.4                          |
| Pharmacy                                                 | \$40.18          | 0.53                         | \$12.70             | 0.39                         | \$77.64              | 0.73                         |
| Children's store                                         | \$34.89          | 0.25                         | \$3.82              | 0.11                         | \$77.24              | 0.44                         |
| Convenience and miscellaneous food                       | \$28.38          | 0.48                         | \$10.95             | 0.38                         | \$52.15              | 0.62                         |
| Other eating places, restaurants                         | \$27.96          | 0.4                          | \$3.64              | 0.21                         | \$61.13              | 0.66                         |
| Uber, Lyft, taxi                                         | \$25.71          | 0.18                         | \$3.78              | 0.09                         | \$55.60              | 0.29                         |
| Haircut, cosmetic, salon                                 | \$25.57          | 0.31                         | \$2.79              | 0.15                         | \$56.63              | 0.52                         |
| Bank                                                     | \$21.85          | 0.02                         | \$0.33              | 0.01                         | \$51.20              | 0.04                         |
| <b>By inferred type of purchase based on named venue</b> |                  |                              |                     |                              |                      |                              |
| Food-related expenditures                                | \$347.18         | 0.94                         | \$73.21             | 0.9                          | \$720.70             | 0.98                         |
| Dollar discount, thrift, or secondhand store             | \$278.70         | 0.81                         | \$48.66             | 0.75                         | \$592.33             | 0.9                          |
| Purchases made online                                    | \$183.95         | 0.59                         | \$29.66             | 0.46                         | \$394.30             | 0.78                         |

# UNCONDITIONAL CASH AND FAMILY INVESTMENTS IN INFANTS

|                             |         |      |        |      |          |      |
|-----------------------------|---------|------|--------|------|----------|------|
| Non-child-specific clothing | \$51.90 | 0.31 | \$3.52 | 0.1  | \$117.87 | 0.59 |
| Child-related               | \$39.79 | 0.28 | \$4.45 | 0.13 | \$87.97  | 0.49 |
| Cable, internet, utilities  | \$36.45 | 0.14 | \$1.40 | 0.04 | \$84.22  | 0.28 |
| Criminal justice related    | \$10.84 | 0.13 | \$2.01 | 0.07 | \$22.89  | 0.21 |
| Alcohol, tobacco, casino    | \$8.47  | 0.21 | \$2.10 | 0.15 | \$17.16  | 0.28 |

---

<sup>1</sup> “Other” includes a variety of venues, including automotive, mail/printing, office supplies, men's clothing, legal costs, parking, pet-related expenditures, video games, and the like, of roughly equally small value.

# UNCONDITIONAL CASH AND FAMILY INVESTMENTS IN INFANTS

Appendix Table A6a. ITT estimates of selected pre-registered study outcomes, no additional weighting

|                                                                                       | Low-cash-gift<br>group mean | High-cash-gift<br>group mean | OLS                  | OLS<br>w/covariates   | Effect<br>size | p-<br>value | N   |
|---------------------------------------------------------------------------------------|-----------------------------|------------------------------|----------------------|-----------------------|----------------|-------------|-----|
| Income-to-needs ratio (includes cash gift)                                            | 0.799                       | 0.892                        | 0.094*<br>(0.039)    | 0.137**<br>(0.037)    | 0.23           | 0.000       | 931 |
| [preR] Food Insecurity Index                                                          | 1.209                       | 1.491                        | 0.281*<br>(0.115)    | 0.230+<br>(0.119)     | 0.14           | 0.054       | 929 |
| [preR] Social Services Receipt Index                                                  | 2.874                       | 2.888                        | 0.014<br>(0.110)     | -0.080<br>(0.104)     | -0.05          | 0.442       | 931 |
| [preR] Index of Economic Stress                                                       | 2.678                       | 2.924                        | 0.250*<br>(0.125)    | 0.184<br>(0.128)      | 0.10           | 0.153       | 930 |
| [preR] Child-focused Expenditure Index (amount in last 30 days)                       | 313.351                     | 363.695                      | 50.466*<br>(22.086)  | 65.020**<br>(23.076)  | 0.23           | 0.005       | 931 |
| Household expenditures in average month, including childcare and child-specific goods | 1,791.926                   | 1,931.043                    | 138.544*<br>(55.553) | 152.251**<br>(55.652) | 0.18           | 0.006       | 931 |

[preR] indicates that the outcome was pre-registered; see [socialscisearch.org/trials/3262](https://socialscisearch.org/trials/3262). All income values adjusted to 2019. Detailed description of outcomes are available in Appendix Table A11.

Standard errors in parentheses. P-values are for coefficient on treatment from OLS of outcome on treatment and covariates with site fixed effects. +p<0.10; \*p<0.05; \*\*p<0.01.

Covariates from baseline survey: Mother's age, Completed schooling, Household income, Net worth, General health, Mental health, Race and ethnicity, Marital status, Number of adults in the household, Number of other children born to the mother, Smoked during pregnancy, Drank alcohol during pregnancy, Father living with the mother, Child's sex, Birth weight, Gestational age at birth. Other covariates: Phone interview, child age at interview (in months).

Appendix Table A6b. ITT estimates of selected pre-registered study outcomes applying inverse probability weights adjusting baseline characteristics of the Wave 1 low-cash-gift sample to the Wave 1 high-cash-gift sample

|                                                                                       | Low-cash-gift<br>group mean | High-cash-gift<br>group mean | OLS                   | OLS<br>w/covariates  | Effect<br>size | p-<br>value | N   |
|---------------------------------------------------------------------------------------|-----------------------------|------------------------------|-----------------------|----------------------|----------------|-------------|-----|
| Income-to-needs ratio (includes cash gift)                                            | 0.758                       | 0.892                        | 0.134**<br>(0.046)    | 0.141**<br>(0.040)   | 0.24           | 0.000       | 931 |
| [preR] Food Insecurity Index                                                          | 1.198                       | 1.491                        | 0.293*<br>(0.139)     | 0.284*<br>(0.135)    | 0.17           | 0.036       | 929 |
| [preR] Social Services Receipt Index                                                  | 2.924                       | 2.888                        | -0.036<br>(0.125)     | -0.022<br>(0.119)    | -0.01          | 0.853       | 931 |
| [preR] Index of Economic Stress                                                       | 2.826                       | 2.924                        | 0.098<br>(0.147)      | 0.123<br>(0.142)     | 0.07           | 0.390       | 930 |
| [preR] Child-focused Expenditure Index (amount in last 30 days)                       | 294.089                     | 363.695                      | 69.606**<br>(23.594)  | 73.666**<br>(23.264) | 0.26           | 0.002       | 931 |
| Household expenditures in average month, including childcare and child-specific goods | 1,760.506                   | 1,931.043                    | 170.537**<br>(60.873) | 151.498*<br>(59.648) | 0.18           | 0.011       | 931 |

See notes to Appendix Table A6a.

# UNCONDITIONAL CASH AND FAMILY INVESTMENTS IN INFANTS

Appendix Table A6c. ITT estimates of selected pre-registered outcomes, applying inverse probability weights adjusting baseline characteristics of the pandemic Wave 1 low-cash gift sample to the pandemic Wave 1 high-cash-gift sample

|                                                                                          | Low-cash-gift<br>group mean | High-cash-gift<br>group mean | OLS                   | OLS w/covariates      | Effect<br>size | p-<br>value | N   |
|------------------------------------------------------------------------------------------|-----------------------------|------------------------------|-----------------------|-----------------------|----------------|-------------|-----|
| Income-to-needs ratio (includes cash gift)                                               | 0.750                       | 0.969                        | 0.219**<br>(0.069)    | 0.175**<br>(0.065)    | 0.29           | 0.008       | 325 |
| [preR] Food Insecurity Index                                                             | 1.425                       | 1.570                        | 0.145<br>(0.266)      | 0.265<br>(0.240)      | 0.16           | 0.271       | 324 |
| [preR] Social Services Receipt Index                                                     | 2.856                       | 2.843                        | -0.013<br>(0.212)     | 0.029<br>(0.202)      | 0.02           | 0.886       | 325 |
| [preR] Index of Economic Stress                                                          | 2.644                       | 3.140                        | 0.496+<br>(0.264)     | 0.577*<br>(0.256)     | 0.32           | 0.025       | 325 |
| [preR] Child-focused Expenditure Index<br>(amount in last 30 days)                       | 306.998                     | 417.130                      | 110.133*<br>(53.248)  | 99.977+<br>(51.634)   | 0.35           | 0.054       | 325 |
| Household expenditures in average month,<br>including childcare and child-specific goods | 1,730.933                   | 2,006.715                    | 275.782*<br>(112.249) | 259.823*<br>(113.818) | 0.31           | 0.023       | 325 |

See notes to Appendix Table A6a.

Appendix Table A6d. ITT estimates of pre-registered selected outcomes, applying inverse probability weights adjusting baseline characteristics of pre-pandemic Wave 1 low-cash-gift sample to the pre-pandemic Wave 1 high-cash-gift sample

|                                                                                          | Low-cash-gift<br>group mean | High-cash-gift<br>group mean | OLS                | OLS<br>w/covariates | Effect<br>size | p-<br>value | N   |
|------------------------------------------------------------------------------------------|-----------------------------|------------------------------|--------------------|---------------------|----------------|-------------|-----|
| Income-to-needs ratio (includes cash gift)                                               | 0.765                       | 0.856                        | 0.091<br>(0.056)   | 0.114*<br>(0.045)   | 0.19           | 0.011       | 606 |
| [preR] Food Insecurity Index                                                             | 1.298                       | 1.454                        | 0.156<br>(0.166)   | 0.056<br>(0.165)    | 0.03           | 0.733       | 605 |
| [preR] Social Services Receipt Index                                                     | 2.986                       | 2.908                        | -0.077<br>(0.144)  | -0.096<br>(0.136)   | -0.06          | 0.479       | 606 |
| [preR] Index of Economic Stress                                                          | 2.979                       | 2.824                        | -0.155<br>(0.179)  | -0.222<br>(0.175)   | -0.12          | 0.204       | 605 |
| [preR] Child-focused Expenditure Index (amount in last 30 days)                          | 307.818                     | 339.017                      | 31.199<br>(24.550) | 31.961<br>(25.112)  | 0.11           | 0.203       | 606 |
| Household expenditures in average month, including childcare and<br>child-specific goods | 1,798.841                   | 1,896.095                    | 97.254<br>(74.024) | 77.077<br>(72.017)  | 0.09           | 0.285       | 606 |

See notes to Appendix Table A6a.

# UNCONDITIONAL CASH AND FAMILY INVESTMENTS IN INFANTS

Appendix Table A6e. ITT estimates for selected pre-registered outcomes adjusted to weight baseline characteristics of pre-pandemic Wave 1 sample to represent the full (n=1,000) study sample

|                                                                                       | Low-cash-gift<br>group mean | High-cash-gift<br>group mean | OLS                  | OLS<br>w/covariates  | Effect<br>size | p-<br>value | N   |
|---------------------------------------------------------------------------------------|-----------------------------|------------------------------|----------------------|----------------------|----------------|-------------|-----|
| Income-to-needs ratio (includes cash gift)                                            | 0.835                       | 0.853                        | 0.018<br>(0.051)     | 0.109*<br>(0.046)    | 0.17           | 0.017       | 605 |
| [preR] Food Insecurity Index                                                          | 1.208                       | 1.457                        | 0.249+<br>(0.144)    | 0.143<br>(0.152)     | 0.08           | 0.348       | 604 |
| [preR] Social Services Receipt Index                                                  | 2.894                       | 2.891                        | -0.003<br>(0.138)    | -0.158<br>(0.133)    | -0.10          | 0.236       | 605 |
| [preR] Index of Economic Stress                                                       | 2.736                       | 2.814                        | 0.078<br>(0.154)     | -0.049<br>(0.157)    | -0.03          | 0.756       | 604 |
| [preR] Child-focused Expenditure Index (amount in last 30 days)                       | 299.188                     | 337.863                      | 38.675+<br>(22.848)  | 37.979<br>(25.530)   | 0.14           | 0.137       | 605 |
| Household expenditures in average month, including childcare and child-specific goods | 1,767.011                   | 1,910.144                    | 143.133*<br>(66.355) | 159.737*<br>(66.772) | 0.20           | 0.017       | 605 |

.See notes to Appendix Table A6a.

Appendix Table A6f. ITT estimates of selected pre-registered outcomes adjusted to weight baseline characteristics of Wave 1 follow-up sample to represent the full (n=1,000) study sample

|                                                                                        | Low-cash-gift<br>group mean | High-cash-gift<br>group mean | OLS                  | OLS<br>w/covariates   | Effect<br>size | p-<br>value | N   |
|----------------------------------------------------------------------------------------|-----------------------------|------------------------------|----------------------|-----------------------|----------------|-------------|-----|
| Income-to-needs ratio (includes cash gift)                                             | 0.798                       | 0.890                        | 0.091*<br>(0.040)    | 0.139**<br>(0.037)    | 0.23           | 0.000       | 931 |
| [preR] Food Insecurity Index                                                           | 1.202                       | 1.491                        | 0.289*<br>(0.115)    | 0.228+<br>(0.119)     | 0.14           | 0.055       | 929 |
| [preR] Social Services Receipt Index                                                   | 2.871                       | 2.887                        | 0.016<br>(0.111)     | -0.089<br>(0.107)     | -0.05          | 0.407       | 931 |
| [preR] Index of Economic Stress                                                        | 2.674                       | 2.921                        | 0.248+<br>(0.126)    | 0.169<br>(0.129)      | 0.09           | 0.189       | 930 |
| [preR] Child-focused Expenditure Index (amount in last 30 days)                        | 314.382                     | 363.939                      | 49.557*<br>(22.076)  | 61.765**<br>(23.274)  | 0.22           | 0.008       | 931 |
| Household expenditures in average month, including child care and child-specific goods | 1,794.601                   | 1,933.933                    | 139.332*<br>(56.150) | 147.618**<br>(55.887) | 0.17           | 0.008       | 931 |

See notes to Appendix Table A6a.

# UNCONDITIONAL CASH AND FAMILY INVESTMENTS IN INFANTS

Appendix Table A7. ITT estimates of maternal sleep

|                                                       | Low-cash-gift<br>group mean | High-cash-gift<br>group mean | OLS               | OLS<br>w/covariates | Effect<br>size | p-<br>value | N   |
|-------------------------------------------------------|-----------------------------|------------------------------|-------------------|---------------------|----------------|-------------|-----|
| [preR] Mother Sleep Quality Index                     | 10.775                      | 10.614                       | -0.157<br>(0.200) | -0.124<br>(0.204)   | -0.04          | 0.543       | 929 |
| Sleep quality good or very good                       | 0.465                       | 0.423                        | -0.043<br>(0.033) | -0.037<br>(0.034)   | -0.07          | 0.271       | 931 |
| Difficulty falling asleep: not at all or a little bit | 0.724                       | 0.739                        | 0.015<br>(0.030)  | 0.019<br>(0.030)    | 0.04           | 0.538       | 931 |
| Felt tired in past 7 days: not at all or a little bit | 0.551                       | 0.535                        | -0.014<br>(0.033) | -0.013<br>(0.033)   | -0.03          | 0.705       | 931 |

[preR] indicates that the outcome was pre-registered; see [socialscienceregistry.org/trials/3262](https://socialscienceregistry.org/trials/3262). All income values adjusted to 2019. Detailed description of outcomes are available in Appendix Table A11.

Standard errors in parentheses. P-values are for coefficient on treatment from OLS of outcome on treatment and covariates with site fixed effects.

Covariates from baseline survey: Mother's age, Completed schooling, Household income, Net worth, General health, Mental health, Race and ethnicity, Marital status, Number of adults in the household, Number of other children born to the mother, Smoked during pregnancy, Drank alcohol during pregnancy, Father living with the mother, Child's sex, Birth weight, Gestational age at birth. Other covariates: Phone interview, child age at interview (in months).

# UNCONDITIONAL CASH AND FAMILY INVESTMENTS IN INFANTS

Appendix Table A8. Selected ITT estimates, pre-pandemic Wave 1 sample with in-person data collection

|                                                                 | Low-cash-gift<br>group mean | High-cash-gift<br>group mean | Coefficient        | Coefficient<br>w/covariates | Effect<br>size | p-<br>value | N   |
|-----------------------------------------------------------------|-----------------------------|------------------------------|--------------------|-----------------------------|----------------|-------------|-----|
| [preR] Parent-Child Activities Index                            | 10.064                      | 10.751                       | 0.692**<br>(0.215) | 0.565*<br>(0.222)           | 0.21           | 0.011       | 603 |
| Read Books Together                                             | 2.822                       | 2.985                        | 0.166*<br>(0.074)  | 0.133+<br>(0.077)           | 0.14           | 0.086       | 603 |
| Tell Stories                                                    | 2.722                       | 2.927                        | 0.210*<br>(0.088)  | 0.173+<br>(0.091)           | 0.16           | 0.056       | 603 |
| Play to Build Things                                            | 3.085                       | 3.303                        | 0.218*<br>(0.085)  | 0.166+<br>(0.088)           | 0.15           | 0.059       | 603 |
| Play Groups                                                     | 1.436                       | 1.536                        | 0.098<br>(0.067)   | 0.092<br>(0.071)            | 0.11           | 0.195       | 603 |
| [preR] Child-focused Expenditure Index (amount in last 30 days) | 301.227                     | 339.017                      | 35.173<br>(22.206) | 39.059<br>(25.452)          | 0.15           | 0.125       | 605 |
| Money spent on books                                            | 11.384                      | 16.366                       | 4.848**<br>(1.755) | 5.108**<br>(1.823)          | 0.30           | 0.005       | 605 |
| Money spent on toys                                             | 68.651                      | 84.147                       | 14.723+<br>(7.911) | 18.409*<br>(8.447)          | 0.18           | 0.030       | 605 |
| Money spent on clothes                                          | 141.781                     | 149.314                      | 6.325<br>(10.875)  | 4.048<br>(12.941)           | 0.03           | 0.755       | 605 |
| Money spent on diapers                                          | 65.248                      | 74.956                       | 9.401<br>(5.855)   | 9.933<br>(6.340)            | 0.18           | 0.118       | 605 |
| Money spent on electronics                                      | 14.163                      | 14.233                       | -0.124<br>(5.027)  | 1.561<br>(6.151)            | 0.03           | 0.800       | 605 |
| Any children's books in the home observed by interviewer        | 0.206                       | 0.249                        | 0.045<br>(0.034)   | 0.059+<br>(0.034)           | 0.14           | 0.087       | 600 |

[preR] indicates that the outcome was pre-registered; see [socialscienceregistry.org/trials/3262](https://socialscienceregistry.org/trials/3262). All income values adjusted to 2019. Detailed description of outcomes are available in Appendix Table A11.

Standard errors in parentheses. P-values are for coefficient on treatment from OLS of outcome on treatment and covariates with site fixed effects. +p<0.10; \*p<0.05; \*\*p<0.01.

Covariates from baseline survey: Mother's age, Completed schooling, Household income, Net worth, General health, Mental health, Race and ethnicity, Marital status, Number of adults in the household, Number of other children born to the mother, Smoked during pregnancy, Drank alcohol during pregnancy, Father living with the mother, Child's sex, Birth weight, Gestational age at birth. Other covariates: Phone interview, child age at interview (in months).

# UNCONDITIONAL CASH AND FAMILY INVESTMENTS IN INFANTS

Appendix Table A9. ITT estimates of item-level of housing quality, neighborhood safety, food security, social services and maternal HOPE indices

|                                                 | Low-cash-gift<br>group mean | High-cash-gift<br>group mean | OLS                | OLS<br>w/covariates | Effect<br>size | p-<br>value | N   |
|-------------------------------------------------|-----------------------------|------------------------------|--------------------|---------------------|----------------|-------------|-----|
| <b>Housing Quality Index items</b>              |                             |                              |                    |                     |                |             |     |
| No problem with bad walls                       | 0.693                       | 0.694                        | 0.000<br>(0.031)   | 0.002<br>(0.032)    | 0.00           | 0.951       | 930 |
| No problem with bad plumbing                    | 0.818                       | 0.812                        | -0.006<br>(0.026)  | -0.012<br>(0.027)   | -0.03          | 0.651       | 930 |
| No problem with rodents                         | 0.790                       | 0.819                        | 0.029<br>(0.026)   | 0.030<br>(0.027)    | 0.07           | 0.260       | 930 |
| No problem with cockroaches                     | 0.752                       | 0.707                        | -0.047<br>(0.029)  | -0.043<br>(0.030)   | -0.10          | 0.146       | 930 |
| No problem with bad locks                       | 0.889                       | 0.882                        | -0.006<br>(0.021)  | -0.004<br>(0.022)   | -0.01          | 0.843       | 930 |
| No problem with bad windows                     | 0.825                       | 0.830                        | 0.006<br>(0.025)   | 0.002<br>(0.027)    | 0.01           | 0.933       | 930 |
| No problem with bad heat                        | 0.883                       | 0.882                        | -0.001<br>(0.021)  | -0.004<br>(0.022)   | -0.01          | 0.866       | 929 |
| Housing condition is good or excellent          | 0.689                       | 0.679                        | -0.011<br>(0.031)  | -0.010<br>(0.031)   | -0.02          | 0.737       | 930 |
| <b>Perceptions of Neighborhood Safety items</b> |                             |                              |                    |                     |                |             |     |
| Neighborhood safety: day (higher = safer)       | 2.357                       | 2.248                        | -0.111*<br>(0.044) | -0.102*<br>(0.047)  | -0.16          | 0.031       | 929 |
| Neighborhood safety: night (higher = safer)     | 2.024                       | 1.932                        | -0.093+<br>(0.053) | -0.075<br>(0.056)   | -0.09          | 0.177       | 927 |
| <b>Food Insecurity Index items</b>              |                             |                              |                    |                     |                |             |     |
| Sometimes/often didn't have enough food         | 0.375                       | 0.444                        | 0.069*<br>(0.033)  | 0.045<br>(0.034)    | 0.09           | 0.189       | 930 |
| Sometimes/often couldn't afford balanced meals  | 0.293                       | 0.381                        | 0.088**<br>(0.032) | 0.086**<br>(0.033)  | 0.19           | 0.009       | 927 |
| Ever ate less than felt they should             | 0.215                       | 0.274                        | 0.059*<br>(0.029)  | 0.043<br>(0.029)    | 0.10           | 0.149       | 928 |
| Ever cut size or skipped meals                  | 0.192                       | 0.240                        | 0.048+<br>(0.028)  | 0.044<br>(0.028)    | 0.11           | 0.124       | 929 |
| Cut meal frequency: 3 or more months            | 0.134                       | 0.154                        | 0.020<br>(0.024)   | 0.013<br>(0.024)    | 0.04           | 0.583       | 929 |
| <b>Social Services Receipt Index items</b>      |                             |                              |                    |                     |                |             |     |
| Received food stamps                            | 0.651                       | 0.642                        | -0.009<br>(0.032)  | -0.024<br>(0.030)   | -0.05          | 0.425       | 931 |
| Received free or reduced child care             | 0.199                       | 0.240                        | 0.042<br>(0.027)   | 0.034<br>(0.027)    | 0.09           | 0.198       | 931 |
| Received Early Head Start                       | 0.078                       | 0.081                        | 0.002              | -0.005              | -0.02          | 0.768       | 931 |



# UNCONDITIONAL CASH AND FAMILY INVESTMENTS IN INFANTS

|                                               |       |       |                    |                     |       |       |     |
|-----------------------------------------------|-------|-------|--------------------|---------------------|-------|-------|-----|
| Received Head Start                           | 0.057 | 0.070 | (0.018)<br>0.014   | (0.018)<br>0.011    | 0.05  | 0.504 | 931 |
| Received WIC                                  | 0.693 | 0.721 | (0.016)<br>0.028   | (0.016)<br>-0.004   | -0.01 | 0.898 | 931 |
| Received state unemployment                   | 0.024 | 0.047 | (0.030)<br>0.023+  | (0.031)<br>0.037**  | 0.24  | 0.004 | 931 |
| Received cash assistance                      | 0.144 | 0.151 | (0.013)<br>0.007   | (0.013)<br>0.017    | 0.05  | 0.469 | 931 |
| Received Medicaid                             | 0.692 | 0.663 | (0.023)<br>-0.028  | (0.023)<br>-0.047   | -0.10 | 0.117 | 931 |
| Received housing assistance                   | 0.230 | 0.180 | (0.030)<br>-0.051+ | (0.030)<br>-0.077** | -0.18 | 0.003 | 931 |
| Received LIHEAP                               | 0.102 | 0.086 | (0.027)<br>-0.016  | (0.026)<br>-0.023   | -0.08 | 0.230 | 931 |
|                                               |       |       | (0.019)            | (0.019)             |       |       |     |
| <b>HOPE Maternal Agency Scale items</b>       |       |       |                    |                     |       |       |     |
| Mom: can get out of a jam                     | 3.699 | 3.582 | -0.118<br>(0.075)  | -0.097<br>(0.077)   | -0.09 | 0.209 | 920 |
| Mom: energetically pursue goals               | 3.967 | 4.000 | 0.034<br>(0.061)   | -0.001<br>(0.064)   | -0.00 | 0.983 | 926 |
| Mom: lots of ways around any problem          | 3.969 | 3.919 | -0.047<br>(0.063)  | -0.029<br>(0.066)   | -0.03 | 0.662 | 924 |
| Mom: get things in life that are important    | 4.286 | 4.191 | -0.095+<br>(0.053) | -0.063<br>(0.056)   | -0.08 | 0.262 | 928 |
| Mom: can problem solve despite discouragement | 4.132 | 3.995 | -0.135*<br>(0.055) | -0.147*<br>(0.058)  | -0.18 | 0.012 | 929 |
| Mom: past prepared for future                 | 4.295 | 4.283 | -0.012<br>(0.055)  | 0.018<br>(0.057)    | 0.02  | 0.747 | 927 |
| Mom: successful                               | 3.677 | 3.670 | -0.007<br>(0.062)  | 0.005<br>(0.064)    | 0.00  | 0.942 | 927 |
| Mom: meets goals                              | 3.778 | 3.791 | 0.014<br>(0.059)   | -0.009<br>(0.061)   | -0.01 | 0.882 | 928 |

[preR] indicates that the outcome was pre-registered; see [socialscienceregistry.org/trials/3262](https://socialscienceregistry.org/trials/3262). All income values adjusted to 2019. Detailed description of outcomes are available in Appendix Table A11.

Standard errors in parentheses. P-values are for coefficient on treatment from OLS of outcome on treatment and covariates with site fixed effects. +p<0.10; \*p<0.05; \*\*p<0.01.

Covariates from baseline survey: Mother's age, Completed schooling, Household income, Net worth, General health, Mental health, Race and ethnicity, Marital status, Number of adults in the household, Number of other children born to the mother, Smoked during pregnancy, Drank alcohol during pregnancy, Father living with the mother, Child's sex, Birth weight, Gestational age at birth. Other covariates: Phone interview, child age at interview (in months).

# UNCONDITIONAL CASH AND FAMILY INVESTMENTS IN INFANTS

Appendix Table A10. ITT estimates of pre-registered outcomes, multiple hypothesis testing with complete families

|                                                                                    | Low-cash-<br>gift group<br>mean | High-cash-gift group<br>mean | OLS<br>w/FE         | OLS w/FE<br>w/covariates | Effect<br>size | p-<br>value | Wyoung adj. p-<br>value | N   |
|------------------------------------------------------------------------------------|---------------------------------|------------------------------|---------------------|--------------------------|----------------|-------------|-------------------------|-----|
| [preR] Purchases for child since birth<br>Index                                    | 4.801                           | 4.914                        | 0.116<br>(0.131)    | 0.243+<br>(0.136)        | 0.12           | 0.074       | 0.205                   | 931 |
| [preR] Child-focused Expenditure Index<br>(amount in last 30 days)                 | 313.351                         | 363.695                      | 50.466*<br>(22.086) | 65.020**<br>(23.074)     | 0.23           | 0.005       | 0.024                   | 931 |
| [preR] Cost of paid child care last week                                           | 43.808                          | 52.712                       | 8.938<br>(6.253)    | 7.460<br>(6.034)         | 0.08           | 0.217       | 0.381                   | 931 |
| [preR] Any time in a childcare or day care<br>center (last year)                   | 0.274                           | 0.298                        | 0.024<br>(0.030)    | 0.022<br>(0.030)         | 0.05           | 0.462       | 0.477                   | 929 |
| [preR] Perceptions of Neighborhood<br>Safety Index                                 | 4.382                           | 4.186                        | -0.198*<br>(0.089)  | -0.170+<br>(0.094)       | -0.13          | 0.071       | 0.247                   | 926 |
| [From preR] Housing Quality Index                                                  | 14.544                          | 14.410                       | -0.141<br>(0.185)   | -0.093<br>(0.187)        | -0.03          | 0.620       | 0.748                   | 886 |
| [preR] Has been homeless or in group<br>shelter indicator                          | 0.084                           | 0.094                        | 0.010<br>(0.019)    | 0.025<br>(0.019)         | 0.09           | 0.177       | 0.414                   | 930 |
| [preR] Excessive Residential Mobility<br>Indicator (3 times or more)               | 0.060                           | 0.057                        | -0.003<br>(0.016)   | 0.010<br>(0.016)         | 0.04           | 0.517       | 0.748                   | 930 |
| [preR] Index of Economic Stress                                                    | 2.678                           | 2.924                        | 0.250*<br>(0.125)   | 0.184<br>(0.128)         | 0.10           | 0.153       | 0.166                   | 930 |
| [preR] Below 100% of federal poverty<br>level incl. cash gift (income to needs <1) | 0.714                           | 0.681                        | -0.033              | -0.071*                  | -0.16          | 0.015       | 0.036                   | 931 |
| [preR] Food Insecurity Index                                                       | 1.209                           | 1.491                        | 0.281*<br>(0.115)   | 0.230+<br>(0.119)        | 0.14           | 0.054       | 0.442                   | 929 |
| [preR] Social Services Receipt Index                                               | 2.874                           | 2.888                        | 0.014<br>(0.110)    | -0.080<br>(0.104)        | -0.05          | 0.443       | 0.996                   | 931 |
| [preR] Mother has worked for pay since<br>birth                                    | 0.553                           | 0.546                        | -0.008<br>(0.033)   | 0.001<br>(0.033)         | 0.00           | 0.985       | 0.948                   | 931 |

## UNCONDITIONAL CASH AND FAMILY INVESTMENTS IN INFANTS

|                                                                        |        |        |                   |                   |       |       |       |     |
|------------------------------------------------------------------------|--------|--------|-------------------|-------------------|-------|-------|-------|-----|
| [preR] Mother has worked when baby was younger than 3 months           | 0.259  | 0.232  | -0.028<br>(0.028) | -0.022<br>(0.029) | -0.05 | 0.442 | 0.987 | 931 |
| [preR] Mother has worked when baby was younger than 6 months           | 0.416  | 0.431  | 0.014<br>(0.033)  | 0.017<br>(0.033)  | 0.04  | 0.602 | 0.996 | 931 |
| [preR] Mother has worked full time for pay since birth                 | 0.319  | 0.300  | -0.020<br>(0.030) | 0.006<br>(0.031)  | 0.01  | 0.834 | 0.996 | 931 |
| [preR] Mother has worked full time when baby was younger than 3 months | 0.155  | 0.141  | -0.015<br>(0.023) | -0.006<br>(0.024) | -0.02 | 0.789 | 0.996 | 931 |
| [preR] Mother has worked full time when baby was younger than 6 months | 0.237  | 0.222  | -0.016<br>(0.027) | 0.005<br>(0.028)  | 0.01  | 0.852 | 0.857 | 931 |
| [preR] Mother's education and training attainment indicator            | 0.261  | 0.272  | 0.010<br>(0.029)  | 0.014<br>(0.030)  | 0.03  | 0.650 | 0.431 | 931 |
| [preR] Maternal Global Happiness Item                                  | 2.236  | 2.254  | 0.018<br>(0.047)  | 0.008<br>(0.047)  | 0.01  | 0.866 | 0.626 | 925 |
| [preR] HOPE Maternal Agency scale                                      | 31.718 | 31.321 | -0.389<br>(0.303) | -0.349<br>(0.310) | -0.08 | 0.261 | 0.401 | 929 |

[preR] indicates that the outcome was pre-registered; see [socialscisearch.org/trials/3262](https://socialscisearch.org/trials/3262). All income values adjusted to 2019. Detailed description of outcomes are available in Appendix Table A11.

Standard errors in parentheses. P-values are for coefficient on treatment from OLS of outcome on treatment and covariates with site fixed effects. +p<0.10; \*p<0.05; \*\*p<0.01.

Covariates from baseline survey: Mother's age, Completed schooling, Household income, Net worth, General health, Mental health, Race and ethnicity, Marital status, Number of adults in the household, Number of other children born to the mother, Smoked during pregnancy, Drank alcohol during pregnancy, Father living with the mother, Child's sex, Birth weight, Gestational age at birth. Other covariates: Phone interview, child age at interview (in months).

## Appendix A11. Variable descriptions

Following protocols of nationally representative U.S. surveys, mothers reported pre-tax household income during the prior calendar year, as opposed to the last 12 months. Mothers reported on their own total earnings; earnings of a spouse, husband, wife or domestic partner; earnings of other members of the household (that is, the people who have been living with the mother and were related to the baby by blood, marriage, adoption, or domestic partnership); government income received by mother and/or other members of the household from the government, such as welfare, SSI, unemployment benefits, and social security; and all other sources of income such as money from any businesses, help from friends or relatives, child support, and any other money income (excluding the cash gift and regular contributions from people who did not live with the mother). For each source of income, reporting follows a similar format of questions starting with the total amount, the unit of reporting, and then an unfolding scale. For example, for mother's earnings, the series of questions are: How much did you earn from all your employers before taxes and deductions during [prevYear]? Is that for the entire last year, per month, or per week? This amount is then verified with the mother: Does [TotalEarnedEst] sound about right for all of [prevYear]? If mother states "don't know" at any point, she is redirected to an unfolding scale that follows the following series until she responds "no": Would those annual earnings in [prevYear] amount to \$10,000 or more? Would it amount to \$15,000 or more? Would it amount to \$20,000 or more? Would it amount to \$25,000 or more? Would it amount to \$5,000 or more? At the end of the income module, each source of income is summed to derive a measure of total combined household income and then the mother is asked to verify it: Is [COMBINEDINCOME] about the right amount of total combined income in your household during the year [PREV YEAR] which included money from jobs, welfare, social security payments, dividends, and any other money income received by you or any other household members? For more specificity on the flow and logic of the survey items, the Wave 1 follow-up questionnaire can be found here: <https://www.babysfirstyears.com/data-and-documentation>.

Because fielding of the Wave 1 survey mimicked the temporal flow of study recruitment, it occurred over two calendar years (July 19 through June 2020), with 40% of the Wave 1 sample reporting on household income for fiscal year 2018 and 60% reporting on fiscal year 2019. While for some participants the last 12 months and previous calendar year overlap perfectly, the

amount of overlap between two 12-month periods varies by family. To accommodate these complexities, we construct measures of average monthly income and an ideal income-to-needs ratio (following the official federal poverty level) by scaling each source of income and combined total income by 1/12th without any loss of generality. This assumes that average monthly income in the approximate 12 months following the start of the experiment (during child's infancy) and the average monthly income in the calendar year prior to Wave 1 data collection (prenatally) are substantively similar. We adjust this average monthly income by the respective cash gift amount (i.e., \$313 for the high-cash-gift group and \$20 for the low-cash-gift group) to reflect the differential influx of cash from the experiment.

How well does average monthly income in the prior year approximate the average monthly income in the 12 months following study enrollment? For about two-thirds of the sample (64%), at least 6 months overlap, and, on average, 8 months overlap. Nonetheless, the potential error in approximation leaves us concerned about the direction of bias in our impact estimate. Theoretically, we might predict that the income effect of the cash transfer intervention to effectively lower other sources of household income for the high-cash-gift group. In this case, our approximation of the monthly income for the high-cash-gift group is likely an overapproximation of the true monthly income and thus the resulting income-to-needs ratio. Based on this reasoning, the proposed measure of the income-to-needs ratio will yield the upper bound of the intervention effect estimate. On the other hand, we might rely on more precise information for the subsample in which we have concurrent information about sources of household income. This subsample is balanced in characteristics across treatment group and has similar characteristics to the full sample. Resulting income-to-needs is larger for this subsample than estimates derived using the assumed monthly values.

Another consideration for constructing income-poverty measures is the choice of the family size. A detailed roster of household members is available contemporaneously at study entry and at the Wave 1 survey; however, neither necessarily captures household size during the period of calendar year reporting of income or during the full period of cash gift receipt. This implies, for example, that mothers report on prior calendar year earnings from a partner currently residing in the household even if that partner might not have been residing in the household during the reported calendar year. Nationally representative estimates from surveys have similar dilemmas though household membership is typically confirmed over a longer time period. The

## UNCONDITIONAL CASH AND FAMILY INVESTMENTS IN INFANTS

Census typically reports poverty levels in the U.S. based on the official poverty measure by using the household income reported in the prior year and the household size reported in the current year. We assess whether the estimate of income-to-needs ratio is sensitive to the choice of timing in which household size is reported, noting that using household size reported at Wave 1 is more consistent with practices of national estimates from the Census. We also construct an income-to-needs ratio using household size reported at baseline to create the minimum income-to-needs ratio and maximum income-to-needs ratio that may result from the different choice of household size, and results are substantively similar.

# UNCONDITIONAL CASH AND FAMILY INVESTMENTS IN INFANTS

Appendix Table A11. Variable descriptions

| Outcome                                          | Survey Question(s)                                                                                                                                                                                                                                                                                                                                                                                                                                                                                                                           | Other Notes                                                                                                                                                                                                                                                                                                                                                                                                                                                                                                                                                                                                                                                                                                                                                                                                           |
|--------------------------------------------------|----------------------------------------------------------------------------------------------------------------------------------------------------------------------------------------------------------------------------------------------------------------------------------------------------------------------------------------------------------------------------------------------------------------------------------------------------------------------------------------------------------------------------------------------|-----------------------------------------------------------------------------------------------------------------------------------------------------------------------------------------------------------------------------------------------------------------------------------------------------------------------------------------------------------------------------------------------------------------------------------------------------------------------------------------------------------------------------------------------------------------------------------------------------------------------------------------------------------------------------------------------------------------------------------------------------------------------------------------------------------------------|
| [preR] Social Services Receipt Index             | <p>I am going to read a list of services, government benefits, and support. Please tell me after each one if you receive it or not.</p> <ol style="list-style-type: none"> <li>01. Food stamps SNAP / EBT</li> <li>02. Free or reduced childcare</li> <li>03. Early Head Start</li> <li>04. Head Start</li> <li>05. Women, Infants and Children (WIC)</li> <li>06. State Unemployment</li> <li>07. Cash assistance</li> <li>08. Medicaid coverage for self</li> <li>09. Housing assistance</li> <li>10. LIHEAP/heat/AC assistance</li> </ol> | <ul style="list-style-type: none"> <li>- Index of total number of benefits received.</li> <li>- Name of specific program in state/locality automatically generated "Other" option, in which there is an open-ended response. We code the observation as getting one of the 10 listed benefits when the open-ended response is clear enough to decide what the benefit is.</li> </ul>                                                                                                                                                                                                                                                                                                                                                                                                                                  |
| [preR] Months to labor market reentry from birth | <p>Did you work for pay after [CHILDNAMEF] was born?</p> <p>In what month(s) did you work for pay?</p>                                                                                                                                                                                                                                                                                                                                                                                                                                       | <ul style="list-style-type: none"> <li>- R responds for each month in a calendar. Interviewer instructions: REPEAT answer to mom and confirm age (in months) for the beginning and ending months/ages mentioned. E.g. For baby born in January: If mom says, "when my baby was 2 months old" interviewer would say, "Ok, so that was in March, right?" E.g. For baby born in January: If mom says, "...in December" interviewer would say, "Ok, so that was when your baby was 11 months old, right?"</li> <li>- Our analytic datasets do not have the specific day of the baby's birth, only the month, though for mothers who consented to our access to the transaction data we can infer day of the month of child's birth. Mothers who report returning to work in the same month as the baby's birth</li> </ul> |

# UNCONDITIONAL CASH AND FAMILY INVESTMENTS IN INFANTS

|                                                               |                                                                                                                                                                                                                                                                                         |                                                                                                                                                                                                                                                                                                                                                           |
|---------------------------------------------------------------|-----------------------------------------------------------------------------------------------------------------------------------------------------------------------------------------------------------------------------------------------------------------------------------------|-----------------------------------------------------------------------------------------------------------------------------------------------------------------------------------------------------------------------------------------------------------------------------------------------------------------------------------------------------------|
|                                                               |                                                                                                                                                                                                                                                                                         | would have a “Months to labor market entry” value of 0 and drop out of the survival analysis. To include these mothers, we assign them a time to work value of 0.23 months. We define a month as having 4.3 weeks (52/12), so $0.23 = 1 / 4.3$ assumes that these mothers returned to work 1 week after the baby’s birth. This affects ~3% of the sample. |
| [preR] Months to full-time labor market reentry from birth    | Did you ever work full-time, that is for at least 35 hours per week?<br>In what month(s) did you work full-time?                                                                                                                                                                        | Same as above, but specifically full-time work. Variable processing and imputed values follow the same procedure.                                                                                                                                                                                                                                         |
| Mom currently working                                         | Do you currently work for pay?                                                                                                                                                                                                                                                          | Follow-on question whether mom is self-employed not counted, thus this measure excludes self-employment. Less than 4% of mothers reported working more than one job in response to this item: Do you have more than one job including part time, evening, or weekend work? Do not include unpaid or volunteer work.                                       |
| Mother’s total hours worked per week at all jobs              | In the past month, how many hours per <u>typical</u> week did you usually work at your <u>MAIN</u> job?<br><br>In the past month, how many hours per <u>typical</u> week did you usually work at all of your other jobs?                                                                | Combined hours in main job with hours worked at all other jobs.                                                                                                                                                                                                                                                                                           |
| [preR] Mother’s education and training attainment indicator   | Since [CHILDNAMEF]’s birth, have you participated in any education training activities?<br><br>Since [CHILDNAMEF]’s birth, have you participated in job training activities?                                                                                                            | Yes = 1, No = 0, so reported means represent percent of moms reporting each training activity.                                                                                                                                                                                                                                                            |
| [preR] Any time in a childcare or day care center (last year) | In addition to a child’s parents, a child may be cared for by others: other adults in the household, by relatives or friends outside of the household, or by a childcare professional in a center or someone’s home. Has [CHILDNAMEF] spent any time in a childcare or day care center? | Collected similarly to questions regarding work and timing of work after birth of a child.<br><br>Yes = 1, No = 0, so reported means represent percent of moms reporting child spend any time in a childcare or day care center.                                                                                                                          |
| Anyone other than parents looked after baby last week         | Now I have some questions about various people who cared for [CHILDNAMEF] <u>throughout last week</u> . I know not all weeks are                                                                                                                                                        | Yes = 1, No = 0, so reported means represent percent of moms reporting someone other than her or child’s father                                                                                                                                                                                                                                           |



# UNCONDITIONAL CASH AND FAMILY INVESTMENTS IN INFANTS

|                                                                 |                                                                                                                                                                                                                                                            |                                                                                                                                                                                 |
|-----------------------------------------------------------------|------------------------------------------------------------------------------------------------------------------------------------------------------------------------------------------------------------------------------------------------------------|---------------------------------------------------------------------------------------------------------------------------------------------------------------------------------|
|                                                                 | the same so please think of a <u>typical</u> 7 day week in the last month when answering the following questions Has anyone other than you or [CHILDNAMEF]'s father looked after [him/her] last week?                                                      | looked after child in last week.                                                                                                                                                |
| [preR] Parent-Child Activities Index                            | Index of items noted below: reading books, telling stories, playing, and building things.                                                                                                                                                                  | - Index is left as missing if more than 1 of the 4 components is missing.<br>- Components are reverse scored such that higher numerical scores indicate more frequent activity. |
| Read Books Together - recoded and reverse scale                 | How often do you read books or look at pictures in a book with [CHILDNAMEF]? Would you say: Every day, A few times a week, A few times a month, or Rarely or not at all?                                                                                   | Reverse scored such that higher numerical scores indicate more frequent activity. Rarely or not at all = 1, A few times a month = 2, A few times a week = 3, Every day = 4      |
| Tell Stories - recoded and reverse scale                        | How often do you tell stories to [CHILDNAMEF]? (Would you say: Every day, A few times a week, A few times a month, or Rarely or not at all?)                                                                                                               | Same as above.                                                                                                                                                                  |
| Play to Build Things - recoded and reverse scale                | How often do you play together with toys for building things? For example, blocks, Tinkertoys, Lincoln Logs, or Duplos. (Would you say: Every day, A few times a week, A few times a month, or Rarely or not at all?)                                      | Same as above.                                                                                                                                                                  |
| Play Groups - recoded and reverse scale                         | How often do you go to any out-of-the home activities or programs that are specifically for babies, like Mommy and Me, library story times, and play groups? (Would you say: Every day, A few times a week, A few times a month, or Rarely or not at all?) | Same as above.                                                                                                                                                                  |
| Reads books or tells stories a few times a week or more         | Dichotomous indicator = 1 if mother indicated reading books or telling stories a few times a week or more.                                                                                                                                                 |                                                                                                                                                                                 |
| Amount spent on childcare in average month (household)          | And, altogether, about how much money did you <u>spend</u> out-of-pocket on all of [CHILDNAMEF]'s child care arrangements <u>last week</u> ?                                                                                                               | - Amount reported for childcare in last week multiplied by 4.3 (52/12).<br>- Missing values replaced by sample mean                                                             |
| [preR] Child-focused Expenditure Index (amount in last 30 days) | Combined total of money spent on books, toys, diapers, clothing, and electronic programs or media.                                                                                                                                                         |                                                                                                                                                                                 |
| Money spent on books (past 30 days)                             | In the <u>last month</u> , have you or any member of your household purchased: Any books or reading material for [CHILDNAMEF]?                                                                                                                             | - If mother reports purchasing any books, but does not report amount, sample mean replaces missing any values for amount.                                                       |

# UNCONDITIONAL CASH AND FAMILY INVESTMENTS IN INFANTS

|                                              |                                                                                                                                                                                                                                                                                     |                                                                                                                                                                                           |
|----------------------------------------------|-------------------------------------------------------------------------------------------------------------------------------------------------------------------------------------------------------------------------------------------------------------------------------------|-------------------------------------------------------------------------------------------------------------------------------------------------------------------------------------------|
|                                              | How much did you spend altogether last month on books or reading materials for [CHILDNAMEF]?                                                                                                                                                                                        | - If mother reports not purchasing any books, 0 replaces any missing values for amount.<br>- If any purchase is missing, amount imputed as 0, and any purchase imputed as no.             |
| Money spent on toys (past 30 days)           | In the past month, have you or any member of your household purchased: Any toys for [CHILDNAMEF]?<br><br>How much did you spend altogether last month on toys for [CHILDNAMEF]?                                                                                                     | Same as books above but for toys.                                                                                                                                                         |
| Money spent on clothes (past 30 days)        | (In the past month, have you or any member of your household purchased) Any clothes or shoes for [CHILDNAMEF]?<br><br>How much did you spend altogether last month on clothes for [CHILDNAMEF]?                                                                                     | Same as books above but for clothes.                                                                                                                                                      |
| Money spent on diapers (past 30 days)        | (In the past month, have you or any member of your household purchased) Any diapers for [CHILDNAMEF]?<br><br>How much did you spend altogether last month on diapers for [CHILDNAMEF]?                                                                                              | Same as books above but for diapers.                                                                                                                                                      |
| Money spent on electronics (past 30 days)    | (In the past month, have you or any member of your household purchased) Videos, apps, or on-demand programs for use on a phone, tablet, desktop or laptop computer and/or TV for [CHILDNAMEF]?<br><br>How much did you spend altogether last month on electronics for [CHILDNAMEF]? | Same as books above but for electronics.                                                                                                                                                  |
| [preR] Purchases for Child Since Birth Index | Index of number of items purchased since time of child's birth: crib, car seat, high chair, safety devices.                                                                                                                                                                         | - Sum of indicator variables for purchase of 8 items.<br>- Index is missing if responses for more than 4 of the 8 items (books, crib, car seat, high chair, 4 safety devices) is missing. |
| Books Purchased - recoded                    | Since [CHILDNAMEF] was born, about how many books have you or a member of your household bought for [him/her]?<br>Would you say: None, 1 to 2, 3 to 5, 6 to 10, or More than 10?                                                                                                    | We create an indicator = 0 for none, =1 for > 0 is created as input into [preR] Purchases for Child Since Birth Index                                                                     |
| Crib Purchased                               | Since [CHILDNAMEF] was born, have you or a member of your household bought any of the following items? They can be new or used. Please answer Yes or No for each item.<br><br>New or used crib?                                                                                     | For each item, we create an indicator, 1 = have purchased since birth, 0 = have not purchased since birth                                                                                 |
| Car Seat Purchased                           | New or used car seat?                                                                                                                                                                                                                                                               | As above.                                                                                                                                                                                 |
| High Chair Purchased                         | New or used high chair?                                                                                                                                                                                                                                                             | As above.                                                                                                                                                                                 |

# UNCONDITIONAL CASH AND FAMILY INVESTMENTS IN INFANTS

|                                                                                |                                                                                                                                                                                                                                                                                                                                                                               |                                                                                                                                                                                                                                                     |
|--------------------------------------------------------------------------------|-------------------------------------------------------------------------------------------------------------------------------------------------------------------------------------------------------------------------------------------------------------------------------------------------------------------------------------------------------------------------------|-----------------------------------------------------------------------------------------------------------------------------------------------------------------------------------------------------------------------------------------------------|
| Number of child safety devices purchased (0-4 possible)                        | New or used safety covers for electrical outlets? New or used safety latches for cabinets or drawers? A new or used safety gate? A new or used smoke detector?                                                                                                                                                                                                                | As above.                                                                                                                                                                                                                                           |
| Any child safety devices purchased                                             | Dichotomous indicator = 1 if any safety covers, smoke detector, safety latches, or safety gate                                                                                                                                                                                                                                                                                | As above.                                                                                                                                                                                                                                           |
| Household expenditures in average month - includes child-focused               | Sum total of expenditures measured in the survey, adjusted to comparable monthly value: food, utilities, cable/internet/phone, child-specific goods (noted above), alcohol, out of pocket child care, and remittances                                                                                                                                                         | - Amount reported for each of food, utilities, cable/internet/phone, alcohol, out of pocket childcare, and remittances is converted to monthly if necessary, then:<br>- Winsorized at mean + 2SD<br>- Missing values replaced by site specific mean |
| Household non-child-focused expenditures in average month (includes childcare) | Sum total of household expenditures measured in the survey noted above subtracting out expenditures on child-specific goods (books, toys, clothing, diapers, and electronic devices and materials)                                                                                                                                                                            |                                                                                                                                                                                                                                                     |
| Amount spent on home utilities in average month (household)                    | About how much do you and/or any members of your household usually spend per month on utilities such as electricity, oil, gas, and water, combined?                                                                                                                                                                                                                           | - Winsorized at mean + 2SD<br>- Missing values replaced by site specific mean                                                                                                                                                                       |
| Amount spent on home cable, internet, and phone in average month (household)   | About how much do you and/or your family living there usually pay per month for cable or satellite TV, internet service and phone/cell phone bills, including data charges?                                                                                                                                                                                                   | - Winsorized at mean + 2SD<br>- Missing values replaced by site specific mean                                                                                                                                                                       |
| Amount spent on food by month (with measurement error)                         | In addition to what you buy with food stamp benefits, do you or anyone else in your family spend any money on food that you use at home? Do you or anyone else in your family spend any money on food that you use at home?                                                                                                                                                   | - Winsorized at mean + 2SD<br>- Missing values replaced by site specific mean                                                                                                                                                                       |
| Amount spent eating out in average month (household)                           | In the prior month, about how much did you and everyone else in your family spend <u>EATING OUT</u> in an average week? Include any carry-out or drive-through orders, too.                                                                                                                                                                                                   | - Winsorized at mean + 2SD<br>- Missing values replaced by site specific mean<br>- This weekly value is multiplied by 4.3                                                                                                                           |
| Amount spent to support others in average month (household)                    | In [prevYear] , did you or anyone else in your family living in your household <u>GIVE</u> any money toward the support of anyone who was not living with you at the time, including child support, alimony, money given to parents, and things like that? Don't include loans or charitable contributions to organizations. About how much did that amount to in [prevYear]? | - Winsorized at mean + 2SD<br>- Missing values replaced by site specific mean<br>- This yearly value is divided by 12                                                                                                                               |
| Amount spent on alcohol in average week (household)                            | In the prior month, how much did you and everyone else in your family spend on <u>ALCOHOLIC BEVERAGES</u> in an average                                                                                                                                                                                                                                                       | - Winsorized at mean + 2SD<br>- Missing values replaced by site specific mean                                                                                                                                                                       |

# UNCONDITIONAL CASH AND FAMILY INVESTMENTS IN INFANTS

|                                                           |                                                                                                                                                                                                                                                                                                                                                                                                                                                                                                                                                                                                                                 |                                                                                                                                                                                                                                                                                                                                                                  |
|-----------------------------------------------------------|---------------------------------------------------------------------------------------------------------------------------------------------------------------------------------------------------------------------------------------------------------------------------------------------------------------------------------------------------------------------------------------------------------------------------------------------------------------------------------------------------------------------------------------------------------------------------------------------------------------------------------|------------------------------------------------------------------------------------------------------------------------------------------------------------------------------------------------------------------------------------------------------------------------------------------------------------------------------------------------------------------|
|                                                           | week?                                                                                                                                                                                                                                                                                                                                                                                                                                                                                                                                                                                                                           | - This weekly value is multiplied by 4.3 when included in monthly totals                                                                                                                                                                                                                                                                                         |
| Packs of cigarettes purchased in average week (household) | In the prior month, about how many <u>PACKS OF CIGARETTES</u> did you and everyone else in your family purchase in an average week?                                                                                                                                                                                                                                                                                                                                                                                                                                                                                             | We report the average number of packs purchased. reported by respondents.                                                                                                                                                                                                                                                                                        |
| Missed Utility Payment                                    | In the past 12 months, did you ever miss a payment for oil, gas, water, or electricity?                                                                                                                                                                                                                                                                                                                                                                                                                                                                                                                                         | We create an indicator 1 = year 0 = no.                                                                                                                                                                                                                                                                                                                          |
| Shut Off Utilities                                        | If missed utility payment...In the past 12 months, was your gas, water, or electricity ever shut off for nonpayment?                                                                                                                                                                                                                                                                                                                                                                                                                                                                                                            | Since question was only asked of those who reported missing a utility payment, there are a number of missing values. We set these to 0 under the assumption that if a payment was not missed, utilities were not shut off.                                                                                                                                       |
| Mother has been evicted since baby's birth                | Since [CHILDNAMEF]'s birth, have you <u>EVER</u> been forced to leave or were evicted from your home?                                                                                                                                                                                                                                                                                                                                                                                                                                                                                                                           | We create an indicator 1 = yes, 0 = no.                                                                                                                                                                                                                                                                                                                          |
| Mother or child missed medical/dental care in last year   | There are many reasons people do not get medical care. During the past 12 months, was there any time when you or your [child/children] needed medical or dental care but did not get it?                                                                                                                                                                                                                                                                                                                                                                                                                                        | We create an indicator 1 = yes, 0 = no.                                                                                                                                                                                                                                                                                                                          |
| Mother has been homeless since baby's birth               | Since [CHILDNAMEF]'s birth, have you <u>ever been</u> homeless?                                                                                                                                                                                                                                                                                                                                                                                                                                                                                                                                                                 | We create an indicator 1 = yes, 0 = no.                                                                                                                                                                                                                                                                                                                          |
| [preR] Food Insecurity Index                              | Food insecurity derived from SPARQ questions that parallel the USDA short form: 1. The food that we bought just didn't last, and we didn't have money to get more; 2. I/we couldn't afford to eat balanced meals; 3. In the last 12 months, did you ever eat less than you felt you should because there wasn't enough money for food? 4. In the last 12 months, did you or other adults in your household ever cut the size of your meals or skip meals because there wasn't enough money for food? 5. How often did this happen? Would you say almost every month, some months but not every month, or in only 1 or 2 months? | - Five indicators variables added to create index in which higher values indicate greater food insecurity<br>- The USDA short form includes a sixth question: "In the last 12 months, were you every hungry but didn't eat because there wasn't enough money for food?" that was mistakenly omitted from our age 1 survey but will be included in later surveys. |
| [preR] Perceptions of Neighborhood Safety Index           | Index of two items: Now I would like to get a sense of how safe you think your neighborhood is. 1. How safe do you feel on the streets near your home <u>during the day</u> – would you say you feel very safe, safe, unsafe, or very unsafe? 2. How safe do you feel on the streets near your home <u>at night</u> ? Would you say you feel very safe, safe, unsafe, or very unsafe?                                                                                                                                                                                                                                           | - Reverse scored so that higher values correspond to feeling more safe.<br>- Index is the sum of the two separate questions on safety at night and during the day.                                                                                                                                                                                               |

# UNCONDITIONAL CASH AND FAMILY INVESTMENTS IN INFANTS

|                                                                   |                                                                                                                                                                                                                                                                                                                                                                                                                                                                                                                                                                                                                                                                  |                                                                                                                                                                                                                                                                                                                                                                                                                                                                     |
|-------------------------------------------------------------------|------------------------------------------------------------------------------------------------------------------------------------------------------------------------------------------------------------------------------------------------------------------------------------------------------------------------------------------------------------------------------------------------------------------------------------------------------------------------------------------------------------------------------------------------------------------------------------------------------------------------------------------------------------------|---------------------------------------------------------------------------------------------------------------------------------------------------------------------------------------------------------------------------------------------------------------------------------------------------------------------------------------------------------------------------------------------------------------------------------------------------------------------|
| Housing quality - Alternative Index                               | <p>Index of items: Now I am going to ask you some questions about problems that people have in some homes or apartments. For each statement, please tell me if these issues are no problem, a small problem, or a big problem. Where you live now, how much of a problem are... Walls with peeling paint or broken plaster? Plumbing that doesn't work? Rats or mice? Cockroaches? Broken locks or no locks on the door to your home? Broken windows or windows without screens? A heating system that doesn't work?</p> <p>Overall, how would you describe the condition of your [MHOUSE]? Would you say it is in excellent, good, fair, or poor condition?</p> | <ul style="list-style-type: none"> <li>- We report an alternative index. For each of the 7 problem items we generate an indicator, a response of "No problem" = 1, "Small problem" or "Big problem" = 0.</li> <li>- We also create an indicator for overall condition is excellent or good.</li> <li>- The reported Housing quality – Alternative Index is a sum of these 8 indicators, with higher values indicating better quality (lack of problems).</li> </ul> |
| [preR] Excessive Residential Mobility Indicator (3 times or more) | Have you moved since [CHILDNAMEF] was born? Thinking back to when [CHILDNAMEF] was born, how many different places have you lived for a week or more? Would you say: 1-2 places, 3-4 places, 5-6 places, 7-10 places, or more than 10 places?                                                                                                                                                                                                                                                                                                                                                                                                                    | - We created and report an indicator equal to 1 if mother and child have lived 3 or more places for a week or more since the child's birth and 0 if they have lived in 1-2 places.                                                                                                                                                                                                                                                                                  |
| [preR] Index of Economic Stress                                   | Index of 9 items: 1. worried about expenses? 2. whether spent more than income? 3. missed rent or mortgage (0 if homeless; 1 if missed rent or mortgage). 4. Set aside rainy day funds for 1 mo. 5. Ability to cover expenses for 1 mo with loss of income. 6. in past 12 mos., missed payments for water, gas, oil, electricity? 7. in past 12 mos., gas, water, electricity ever shut off? 8. Since child's birth, have you ever been evicted or forced to leave? 9. needed medical or dental care and did not get it?                                                                                                                                         | <ul style="list-style-type: none"> <li>- Note that items 6-9 are described above, 1-5 below.</li> <li>- This index is a sum of the 9 indicator variables.</li> </ul>                                                                                                                                                                                                                                                                                                |
| Economic Stress Index: Financial worry                            | Index of 4 items from above 9-item Economic Stress Index: worry about expenses; whether spent more than income; set aside rainy day funds; enough for 1 month to cover expenses.                                                                                                                                                                                                                                                                                                                                                                                                                                                                                 | - This subindex is a sum of the 4 indicators described to the left.                                                                                                                                                                                                                                                                                                                                                                                                 |
| Economic Stress Index: Hardships                                  | Index of 5 items from above 9-item Economic Stress Index: missed rent or mortgage; missed payments for water, gas, oil, or electricity; gas, water, electricity ever shut off; ever evicted or forced to leave; needed medical or dental care and did not get it.                                                                                                                                                                                                                                                                                                                                                                                                | - This subindex is a sum of the 5 indicators described to the left.                                                                                                                                                                                                                                                                                                                                                                                                 |
| Worry always or very frequently about expenses                    | How often do you <u>worry</u> about being able to meet your monthly living expenses? Would you say you worry all the time, very frequently, occasionally, rarely, very rarely, or never?                                                                                                                                                                                                                                                                                                                                                                                                                                                                         | - We create an indicator equal to 1 for always or very frequently, and 0 otherwise.                                                                                                                                                                                                                                                                                                                                                                                 |

# UNCONDITIONAL CASH AND FAMILY INVESTMENTS IN INFANTS

|                                                    |                                                                                                                                                                                                                                                                                                                                                                                                                                                                                                                                                                                                                                                                                                                   |                                                                                                                                                                                                                                              |
|----------------------------------------------------|-------------------------------------------------------------------------------------------------------------------------------------------------------------------------------------------------------------------------------------------------------------------------------------------------------------------------------------------------------------------------------------------------------------------------------------------------------------------------------------------------------------------------------------------------------------------------------------------------------------------------------------------------------------------------------------------------------------------|----------------------------------------------------------------------------------------------------------------------------------------------------------------------------------------------------------------------------------------------|
| Household spent more than income                   | In the past 12 months, would you say that your household has spent more, less or about as much as all of your sources of income combined?                                                                                                                                                                                                                                                                                                                                                                                                                                                                                                                                                                         | - We create an indicator = 1 spent more than all of sources of income combined, 0 otherwise.                                                                                                                                                 |
| Missed a rent or mortgage payment                  | In the past 12 months have you ever missed a rent or mortgage payment?                                                                                                                                                                                                                                                                                                                                                                                                                                                                                                                                                                                                                                            | - We create an indicator = 1 if yes, 0 if no.                                                                                                                                                                                                |
| Haven't set aside emergency funds                  | Have you set aside emergency or rainy day funds that would cover your expenses for 1 month in case of sickness, job loss, economic downturn, or other emergencies?                                                                                                                                                                                                                                                                                                                                                                                                                                                                                                                                                | - We create an indicator = 0 if yes, 1 if no.                                                                                                                                                                                                |
| Could not cover a month of expenses without income | If you were to lose your main source of income, for example your job or government benefits, could you cover your expenses for one month by borrowing money, using savings, selling assets, or borrowing from friends/family?                                                                                                                                                                                                                                                                                                                                                                                                                                                                                     | - We create an indicator = 0 if yes, 1 if no.                                                                                                                                                                                                |
| [preR] HOPE Maternal Agency scale                  | <p>Is it definitely false, mostly false, sometimes true and sometimes false, mostly true or definitely true?</p> <p>In general, I can think of many ways to get out of a jam.</p> <p>In general, I energetically pursue my goals.</p> <p>(In general,) There are lots of ways around any problem.</p> <p>(In general,) I can think of many ways to get the things in life that are important to me.</p> <p>(In general,) Even when others get discouraged, I know I can find a way to solve the problem.</p> <p>(In general,) My past experiences have prepared me well for my future.</p> <p>(In general,) I've been pretty successful in life.</p> <p>(In general,) I meet the goals that I set for myself.</p> | <p>- Each question is coded on a scale from 1-5, with 1 = definitely false, ..., 5=definitely true.</p> <p>- [preR] HOPE Maternal Agency scale is the sum of the 8 items, so ranges from 5-40 with higher values reflecting more agency.</p> |
| [preR] Maternal Global Happiness Item              | <p>Now I have some questions about your life.</p> <p>Taken all together, how would you say things are these days, would you say that you are very happy, pretty happy or not too happy?</p>                                                                                                                                                                                                                                                                                                                                                                                                                                                                                                                       | - We create an ordinal variable, 0 = not too happy, 1 = pretty happy, 2 = very happy                                                                                                                                                         |
